# Supplementary material for: Interface engineering of a Ni9S8/MoS2/Ni3S2 heterostructure to boost biomass upgrading coupled with the hydrogen evolution reaction at large current densities
Source: Royal Society of Chemistry journal article supplement (doi:10.1039/d3nj03560c), 2023-01-01
Supplement: d3nj03560c1.pdf [file d3nj03560c1.pdf]

## Supporting Information

# Interface engineering of Ni<sub>9</sub>S<sub>8</sub>/MoS<sub>2</sub>/Ni<sub>3</sub>S<sub>2</sub> heterostructure to boost biomass upgrade coupled with hydrogen evolution reaction at large current densities

Ao Wang, Yan Meng, Gang Xu, Shi-Jiao Dong and Jun-Ling Song\*

International Joint Research Center for Photoresponsive Molecules and Materials,  
School of Chemical and Material Engineering, Jiangnan University, Lihu Street 1800,  
Wuxi 214122, China

### Experimental section

Reagents and materials: All reagents used in this study were purchased and directly used without further purification: Ni(NO<sub>3</sub>)<sub>2</sub>·6H<sub>2</sub>O(AR), Na<sub>2</sub>MoO<sub>4</sub>·6H<sub>2</sub>O(AR), and CH<sub>4</sub>N<sub>2</sub>S(AR) were purchased from Shanghai Titan Scientific Co., Ltd.. Nickel foam (NF) was purchased from Suzhou Cheng Er Nuo Technology Co. Ltd..

**Physical characterizations:** The structure of Ni-Mo-S is determined by PXRD (Bruker D8, Cu-K $\alpha$ ). the spectra were recorded in the 2 $\theta$  range of 5° to 60°. The morphology of Ni-Mo-S were investigated by scanning electron microscopy (SEM, Hitach S-4800) and transmission electron microscope (TEM, JEOL 2100F). X-ray electron spectroscopy (XPS) was performed on AXIS Supra by Kratos Analytical Inc. Using monochromatized Al K $\alpha$  radiation as X-ray source. All spectra were calibrated by C 1s (284.8 eV).

### Product analysis:

The concentrations of HMF and oxidation products were determined by high

performance liquid chromatography (HPLC) system (Waters 1525) using a  $4.6 \times 250$  mm NuovaSil C18-WH,  $5\mu\text{m}$  column with detection wavelength set at 265 nm and column temperature maintained at  $30\text{ }^\circ\text{C}$ . The HPLC eluent was a mixture of solvent A (5 mM ammonium formate solution) and B (methanol). For the HMF oxidation reaction, isocratic elution separation was performed using 30% A and 70% B at a flow rate of  $0.6\text{ mL min}^{-1}$  over 15 min. HPLC samples were prepared by diluting 1.0 mL of the reaction mixture with 49.0 mL of deionized water. Quantification of HMF and oxidation products was calculated from the calibration curve. The HMF conversion, the product yield, and the FE value of FDCA were calculated using the following equations, where F is Faraday's constant.

The conversion of HMF can be calculated by the following eqn:

$$\text{Conversion} = \frac{n(\text{reacted HMF})}{n(\text{initial HMF})} \times 100\%$$

The selectivity and yield of the FDCA were determined by the following eqn respectively:

$$\text{Selectivity} = \frac{n(\text{FDCA production})}{n(\text{reacted HMF})} \times 100\%$$

$$\text{Yield} = \frac{n(\text{FDCA production})}{n(\text{initial HMF})} \times 100\%$$

The faradaic efficiency of the product was calculated using eqn:

$$\text{FE of FDCA} = \frac{\text{mol of FDCA formed}}{\text{total charge passed}/(6 \times F)} \times 100\%$$

**Electrochemical measurements:** All electrochemical tests were carried out in a three-electrode system using a CHI760E electrochemical workstation (Shanghai Chenhua, China) without iR correction. HMFOR and OER were carried out in a typical three-electrode system with a H-type cell separated by an anion exchange membrane (N117

DuPont). Pt wire and Hg/HgO were used as counter electrode and reference electrode, the as-prepared Ni-Mo-S (1 cm × 1 cm) material was used as the working electrode. The measured voltage value is converted into the electrode potential vs the reversible hydrogen electrode (RHE) by the equation  $E_{\text{RHE}} = E_{\text{Hg/HgO}} + 0.059 \times \text{pH} + 0.098 \text{ V}$ . The electrochemical OER and HMFOR experiments were conducted in 50 mL of 1.0 M NaOH solution with and without 20mM HMF. Electrochemical impedance spectroscopy (EIS) measurements were recorded in the frequency range of  $10^5$ –0.1 Hz with an amplitude of 5 mV. The electric double layer capacitance of the prepared catalyst was determined by the CV of different scanning speeds (20, 40, 60, 80 and 100  $\text{mV s}^{-1}$ ). Without any iR correction.

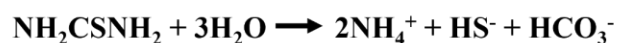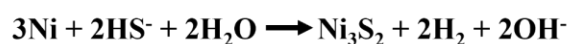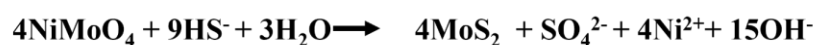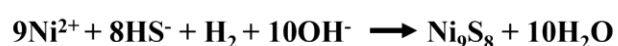

**Scheme. S1** Synthetic reaction equation

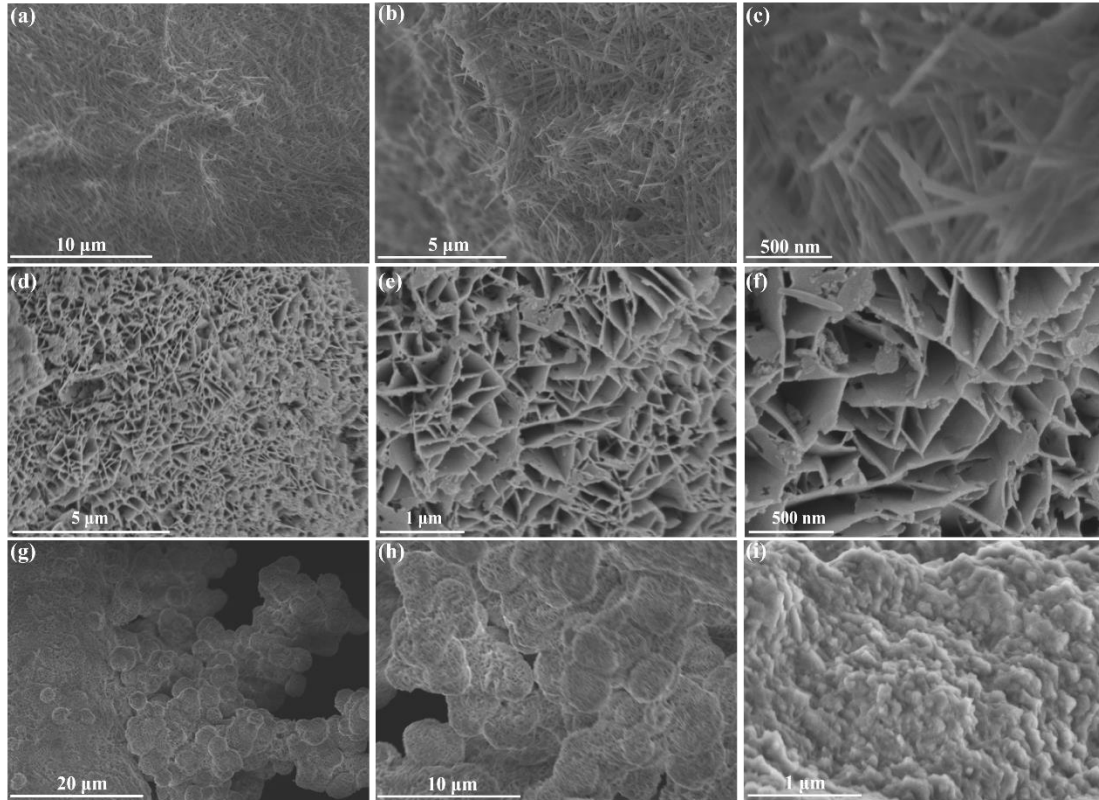

**Fig. S1** (a-c) SEM images of Ni-Mo-O-1, (d-f) Ni-Mo-O-2 and (g-i) Ni-Mo-O-3

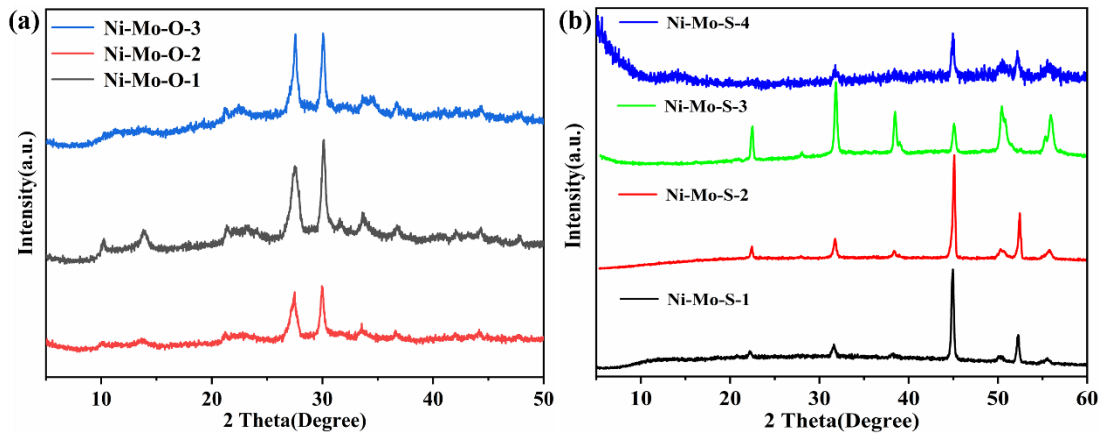

**Fig. S2** XRD of powder scraped from (a) Ni-Mo-O-1, Ni-Mo-O-2 and Ni-Mo-O-3, (b) Ni-Mo-S-1, Ni-Mo-S-2, Ni-Mo-S-3 and Ni-Mo-S-4.

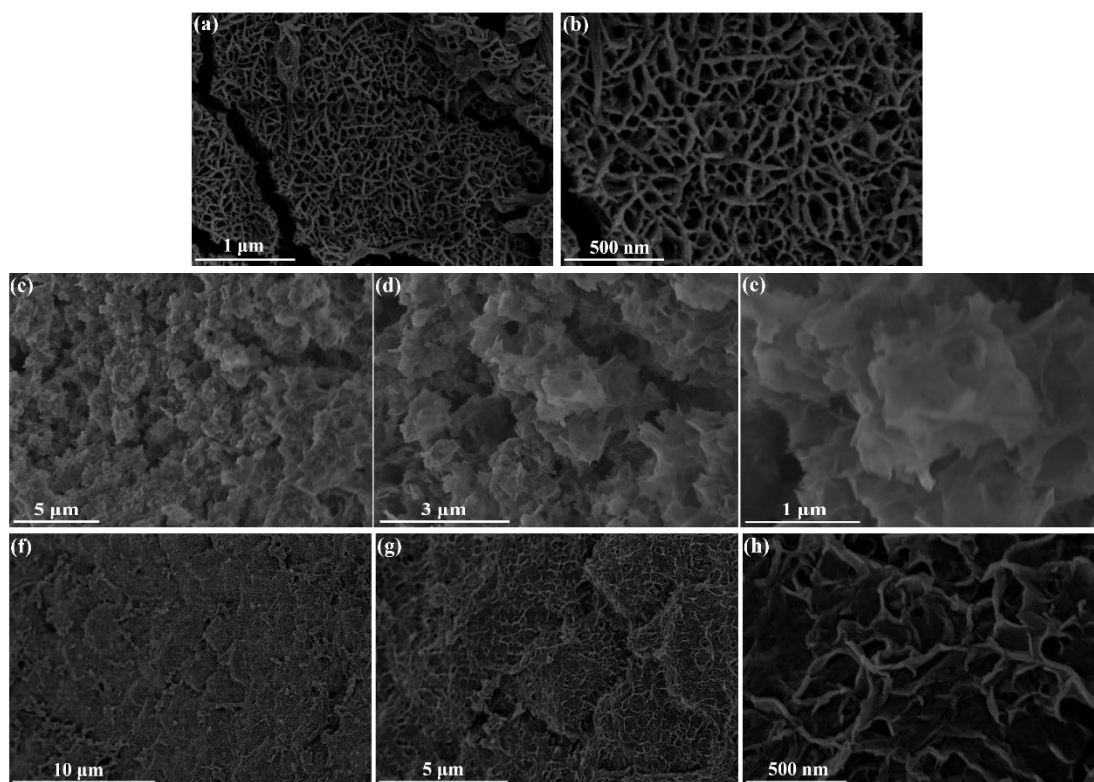

**Fig. S3** (a-b) SEM images of Ni-Mo-S-1, (c-e) Ni-Mo-S-2 and (f-h) Ni-Mo-S-4

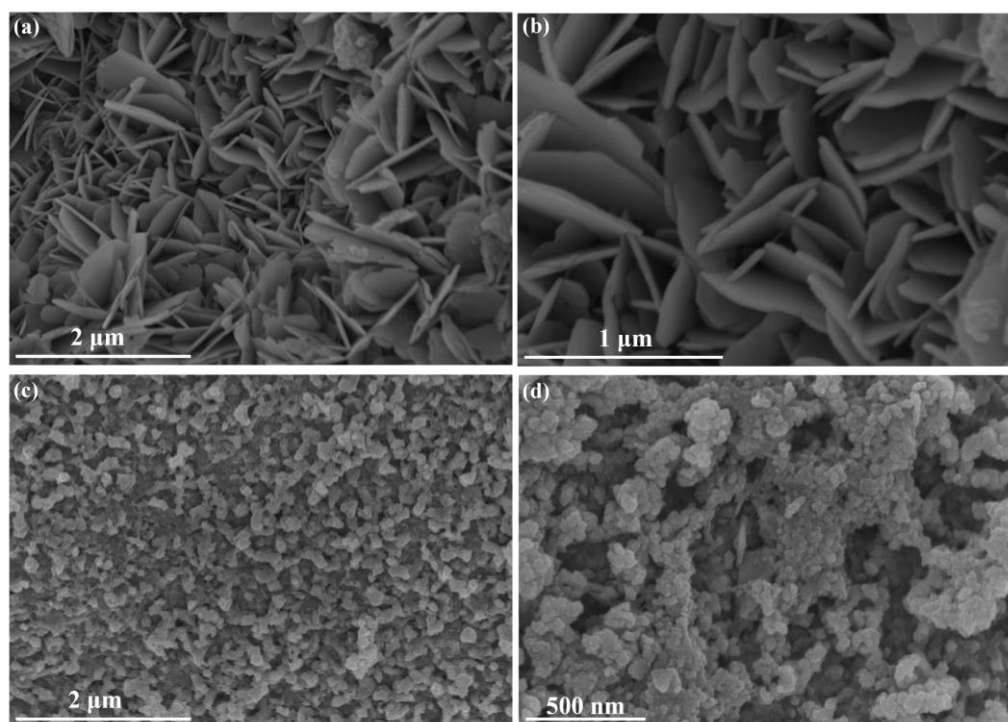

**Fig. S4** (a-b) SEM images of Ni<sub>3</sub>S<sub>2</sub>/NF and (c-d) MoS<sub>2</sub>/CC

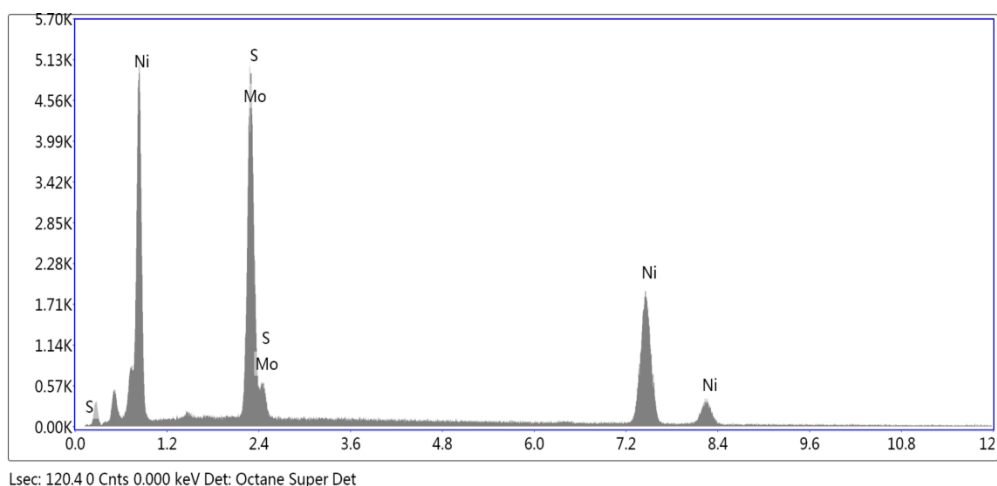

**Fig. S5** EDX spectra of Ni-Mo-S.

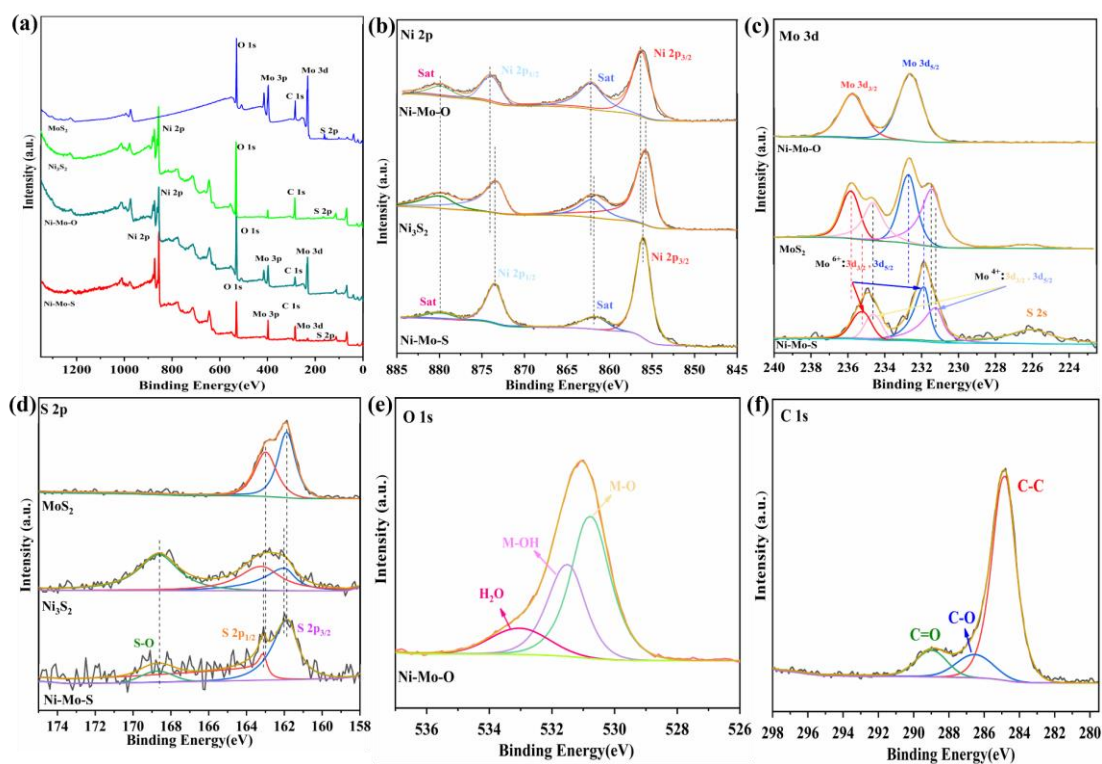

**Fig. S6** (a) XPS survey spectrum of Ni-Mo-S, Ni-Mo-O,  $\text{Ni}_3\text{S}_2/\text{NF}$  and  $\text{MoS}_2/\text{CC}$ . (b) The high-resolution XPS spectra of Ni 2p for Ni-Mo-S, Ni-Mo-O and  $\text{Ni}_3\text{S}_2/\text{NF}$ . (c) Mo 3d for Ni-Mo-S, Ni-Mo-O and  $\text{MoS}_2/\text{CC}$ , (d) S 2p for Ni-Mo-S,  $\text{Ni}_3\text{S}_2/\text{NF}$  and  $\text{MoS}_2/\text{CC}$ , (e) O 1s for Ni-Mo-O, and (f) C 1s for Ni-Mo-S.

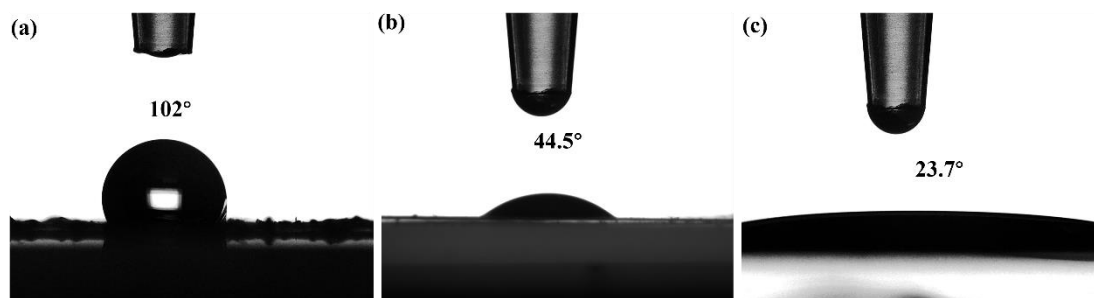

**Fig. S7** (a) Contact Angle of HMF on Ni foam, (b) Ni-Mo-O and (c) Ni-Mo-S electrode surface.

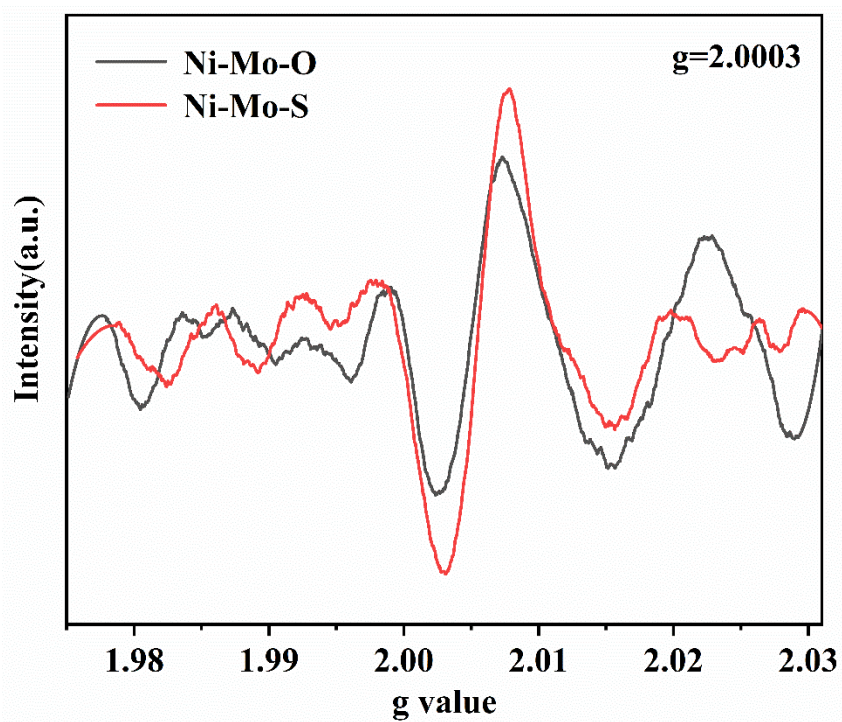

**Fig. S8** EPR spectra of Ni-Mo-O and Ni-Mo-S.

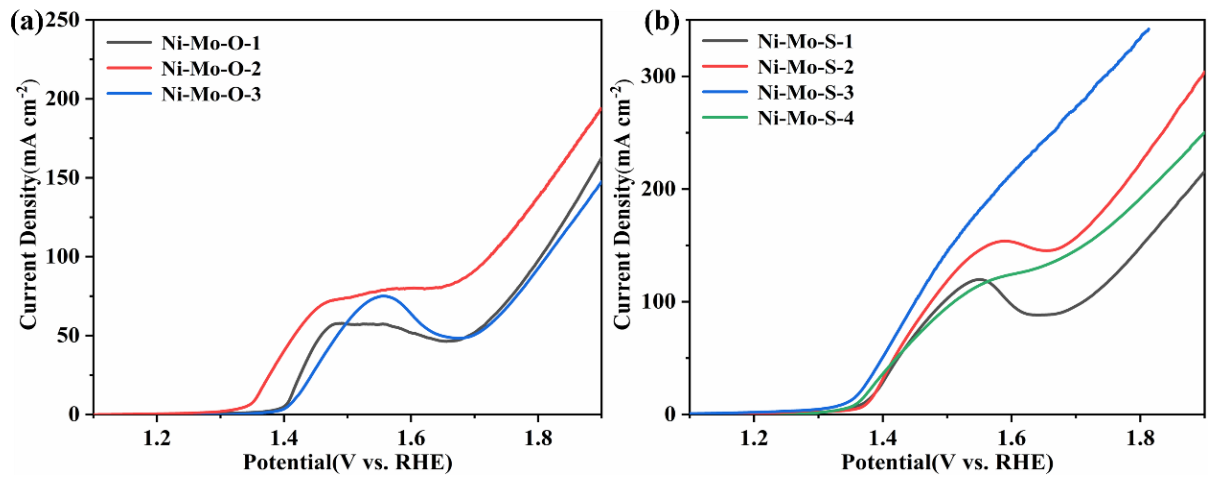

**Fig. S9** LSV curves in the presence of 20 mM HMF of (a) Ni-Mo-O-1, Ni-Mo-O-2 and Ni-Mo-O-3, (b) Ni-Mo-S-1, Ni-Mo-S-2, Ni-Mo-S-3 and Ni-Mo-S-4.

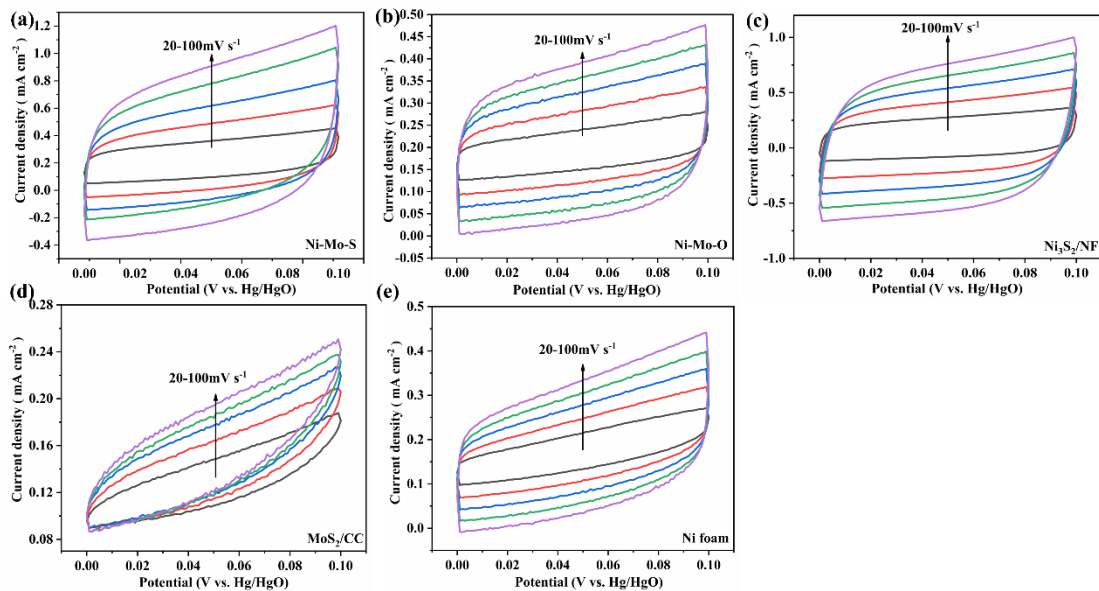

**Fig. S10** The Cyclic voltammograms within the range of no faradaic reactions of tri-layered at different scanning rates for (a) Ni-Mo-S, (b) Ni-Mo-O, (c) Ni<sub>3</sub>S<sub>2</sub>/NF, (d) MoS<sub>2</sub>/CC and (e) Ni foam.



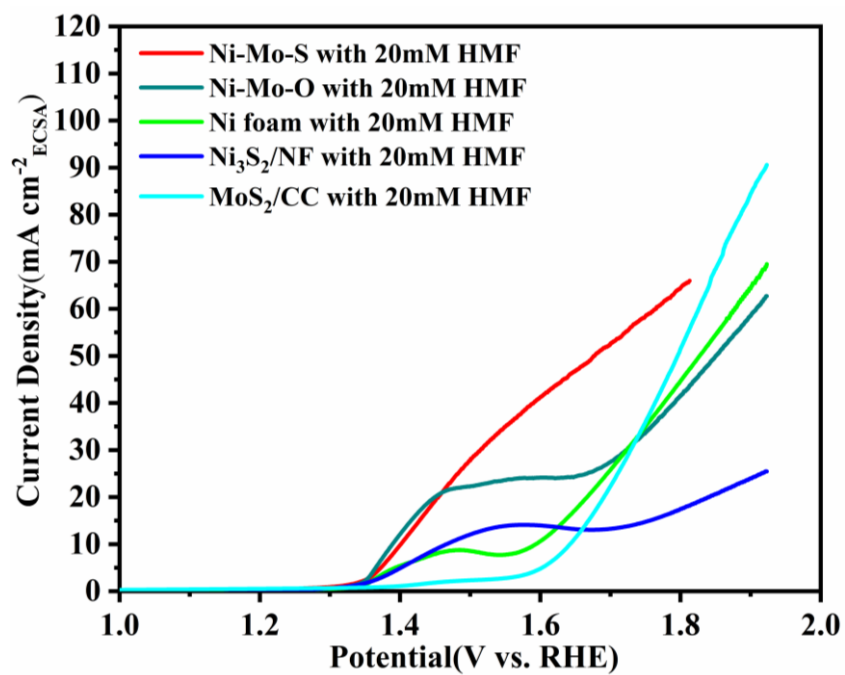

**Fig. S11** Normalized LSV curve from Figure. 5b to ECSA with 20mM HMF.

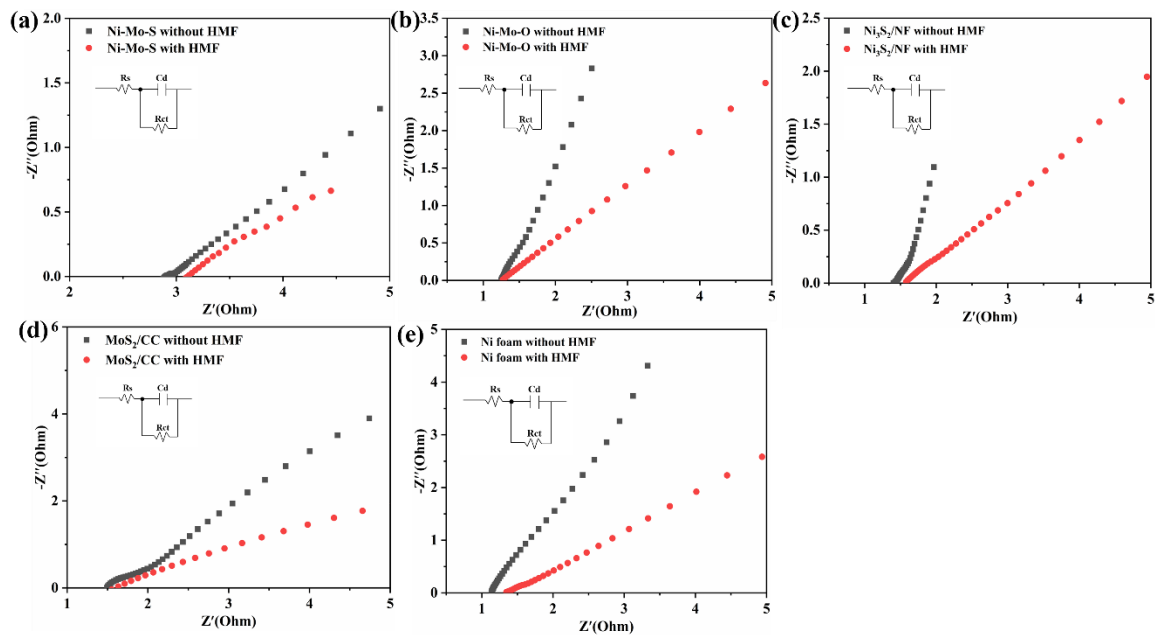

**Fig. S12** The Nyquist plots over the (a) Ni-Mo-S, (b) Ni-Mo-O, (c) Ni<sub>3</sub>S<sub>2</sub>/NF, (d) MoS<sub>2</sub>/CC and (e) Ni foam electrocatalysts in 1.0 M NaOH with and without 20mM HMF.

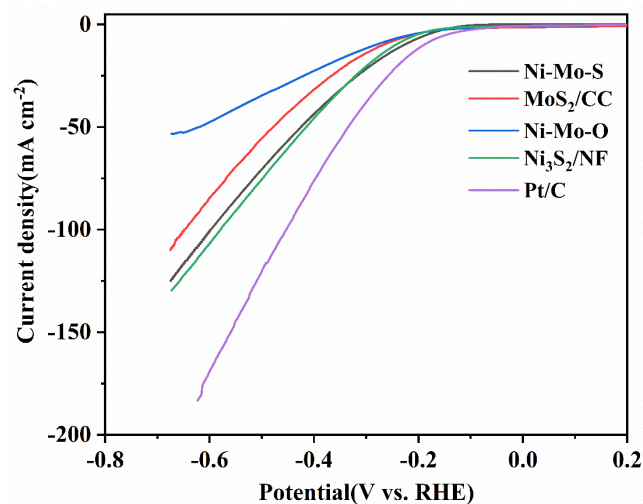

**Fig. S13** LSV curves for Ni-Mo-S, Ni-Mo-O, MoS<sub>2</sub>/CC, Ni<sub>3</sub>S<sub>2</sub>/NF and commercial Pt/C cathode HER in 1.0 M NaOH solution.

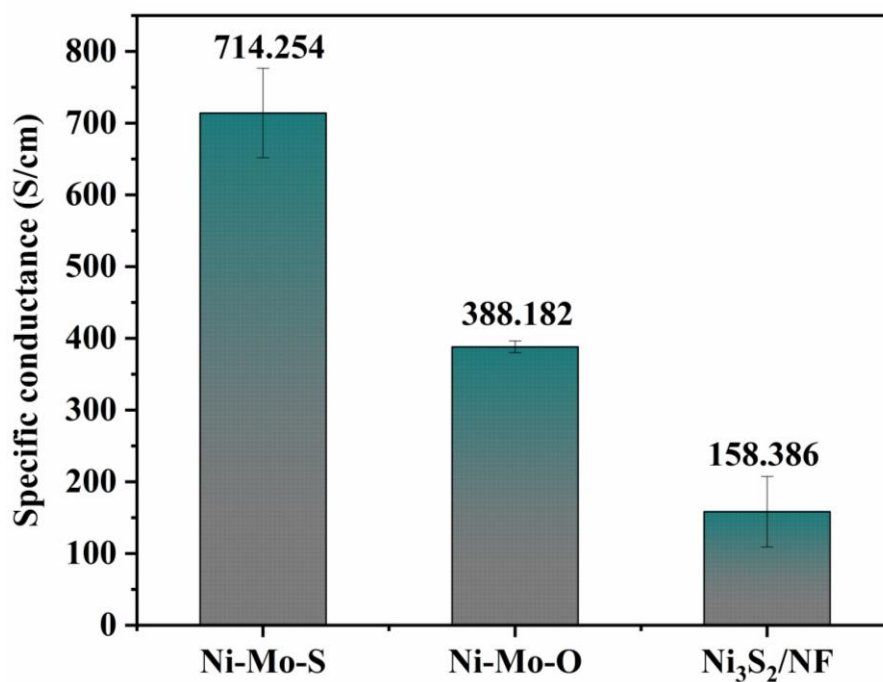

**Fig. S14** Results recorded by four-probe resistance for Ni-Mo-S, Ni-Mo-O, and Ni<sub>3</sub>S<sub>2</sub>/NF<sup>a</sup>.

<sup>a</sup>The resistance test adopts the standard four-probe method, using ST2258C multifunctional digital four-probe tester. Each sample tested data at five evenly distributed sites.

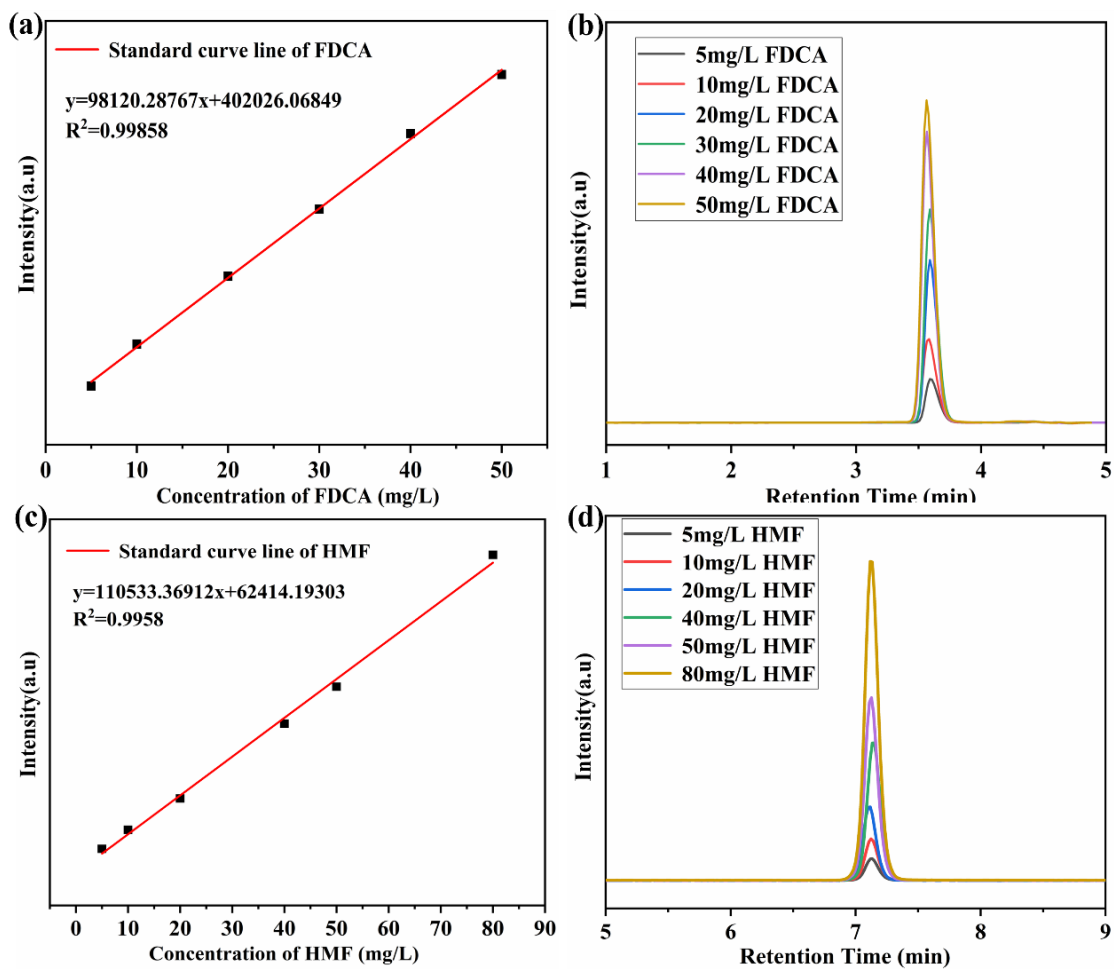

**Fig. S15** HPLC chromatogram of standard samples at different concentrations: (a) FDCA, (c) HMF. Calibration of the HPLC for (b) FDCA, (d) HMF.

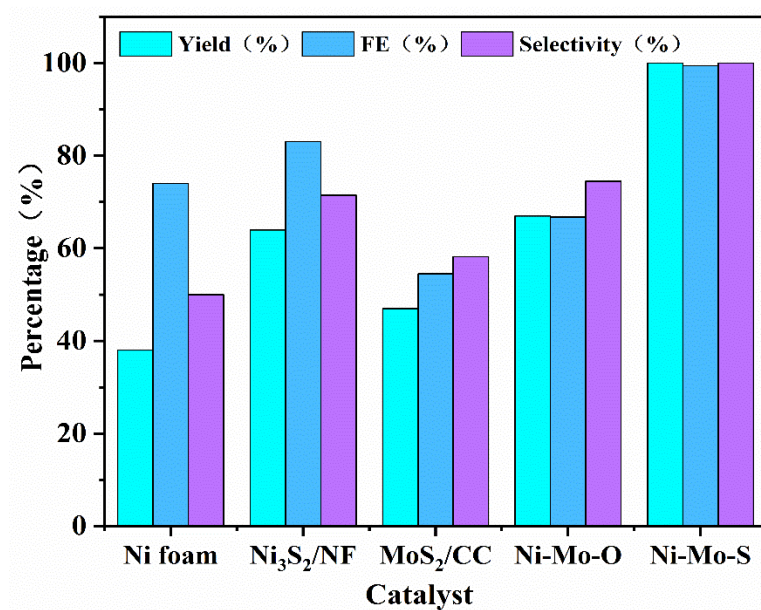

**Fig. S16** HMF oxidation yield, Faraday efficiency, and selectivity of the Ni foam, Ni<sub>3</sub>S<sub>2</sub>/NF, MoS<sub>2</sub>/CC, Ni-Mo-O precursor, and Ni<sub>9</sub>S<sub>8</sub>/MoS<sub>2</sub>/Ni<sub>3</sub>S<sub>2</sub>.

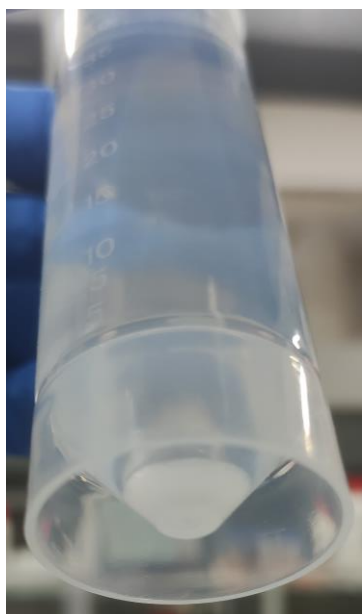

**Fig. S17** Diagram of solid products precipitated by sufficient acidification after electrooxidation of HMF.

$^1\text{H NMR}$  (400 MHz,  $\text{DMSO-}d_6$ )  $\delta$  7.30 (s, 2H).

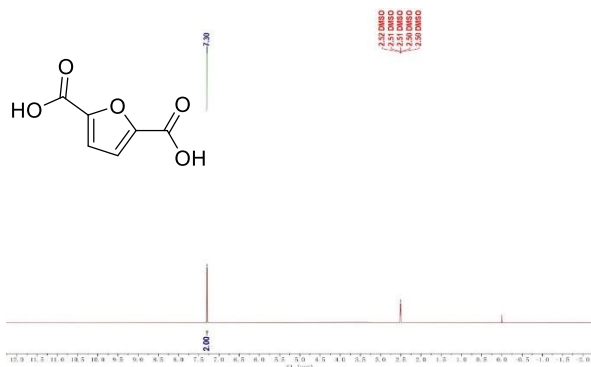

**Fig. S18**  $^1\text{H-NMR}$  spectra of the precipitated solid products in Fig. S9.

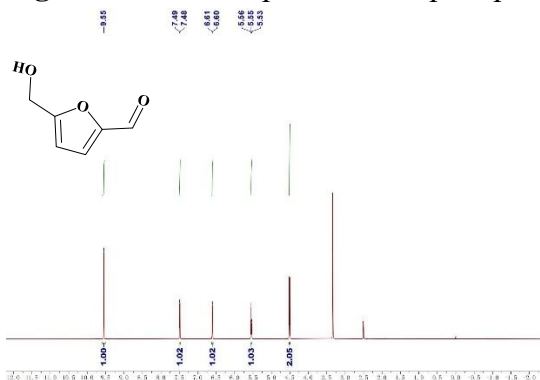

**Fig. S19**  $^1\text{H-NMR}$  spectra of HMF raw material.

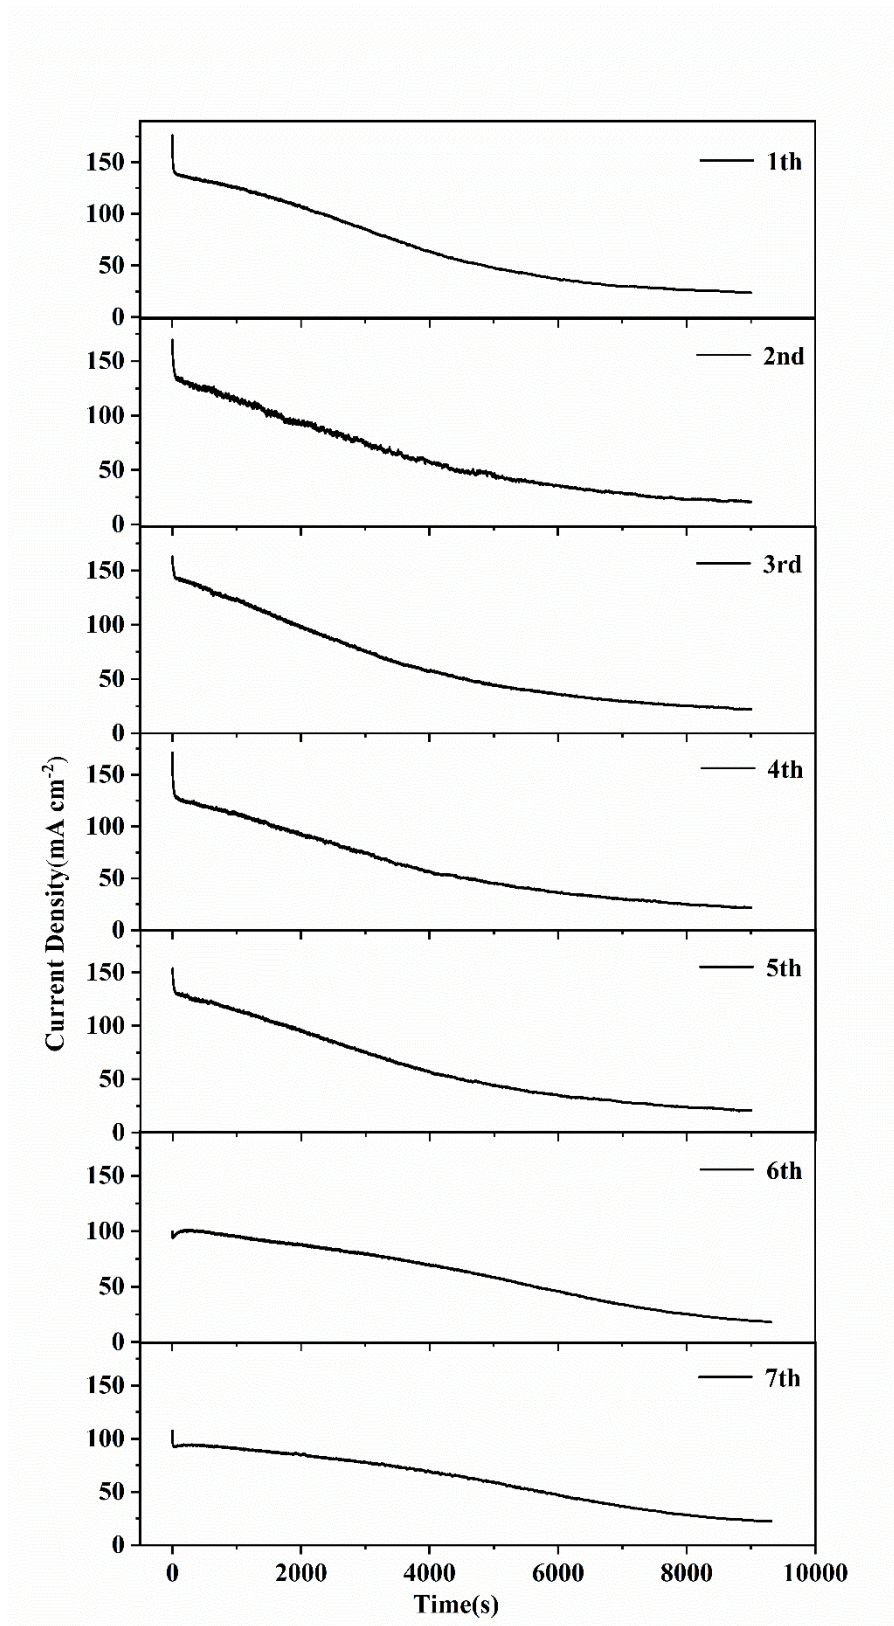

**Fig. S20** The *i-t* curves of HMF oxidation for Ni-Mo-S at a constant potential of 1.52

V (vs. RHE) for the seven successive cycles.

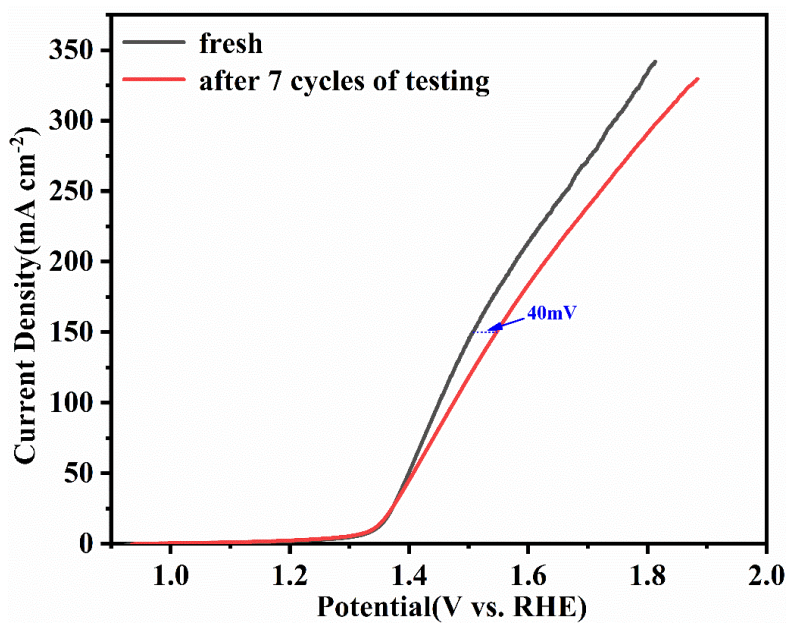

**Fig. S21** The LSV curves of Ni-Mo-S with 20mM HMF in 1M NaOH

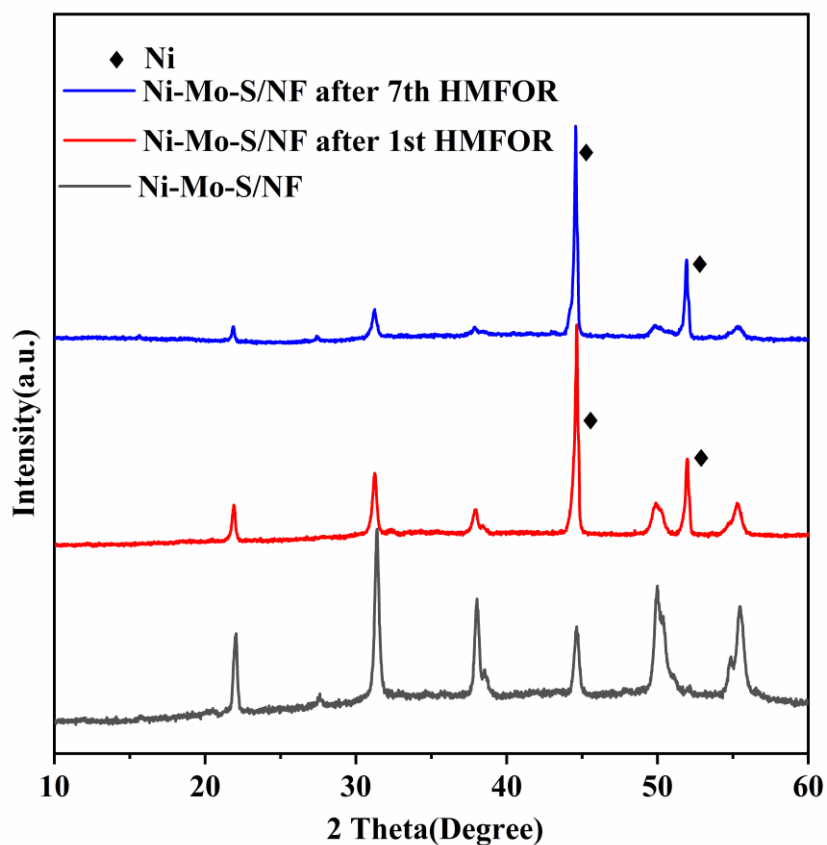

**Fig. S22** XRD of the comparison of before and after once/seven times

chronoamperometric tests for Ni-Mo-S. (Since the XRD after the reaction is tested on

Ni foam, there are more pronounced peaks of Ni ( $44.5^\circ$  and  $52^\circ$ ))



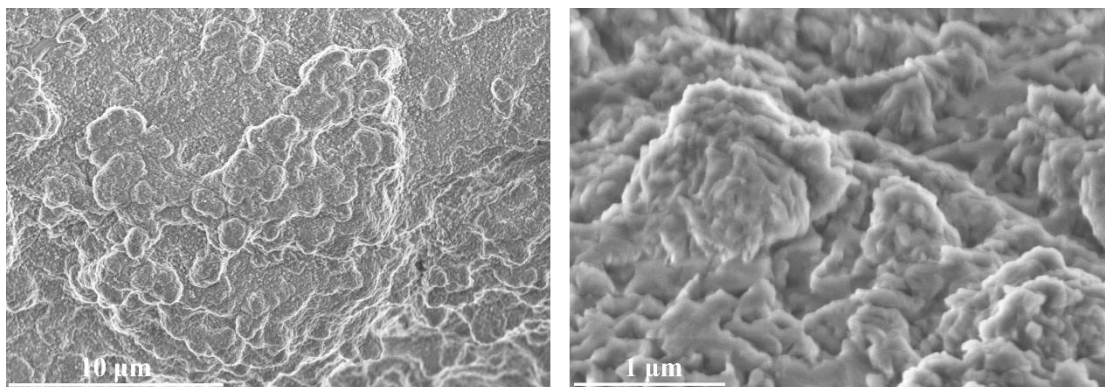

**Fig. S23** SEM images of Ni-Mo-S after seven times chronoamperometric tests.

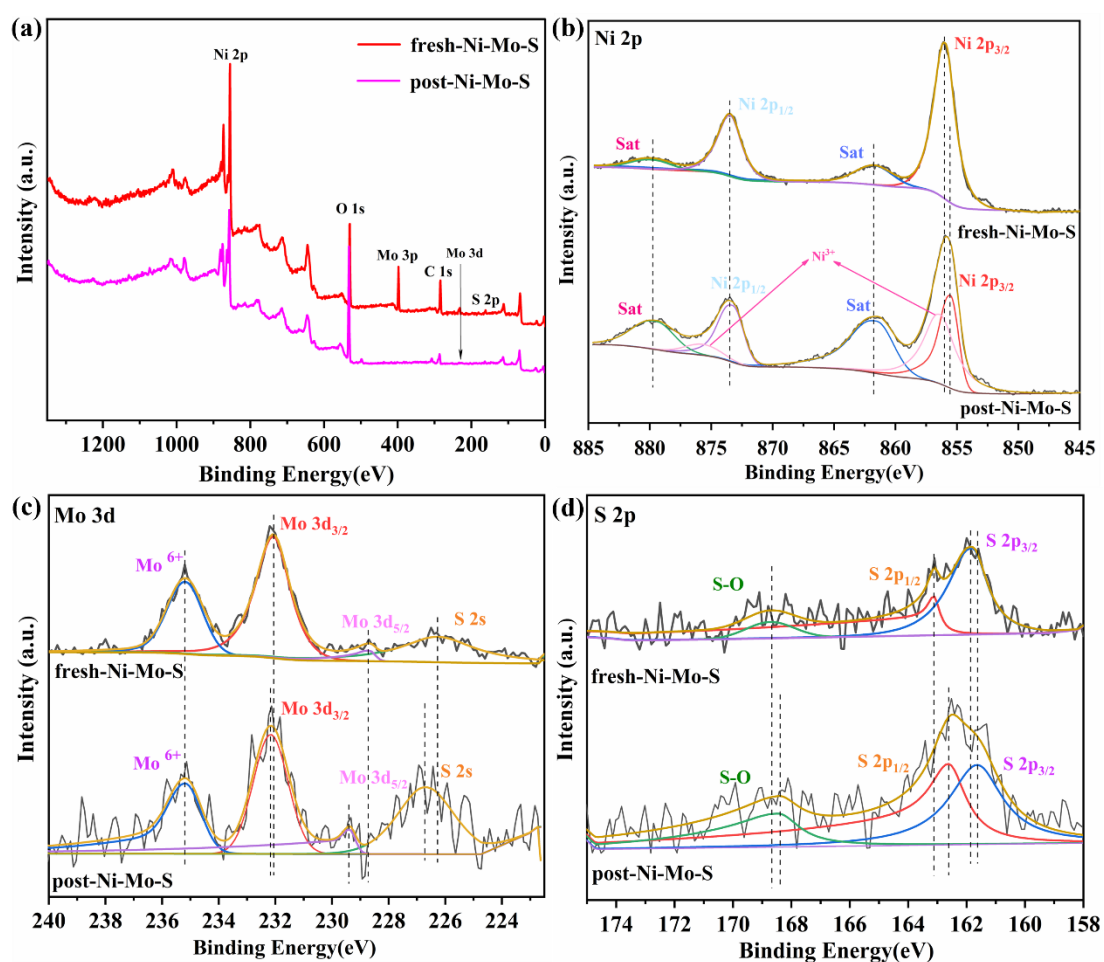

**Fig. S24** XPS spectra of Survey full spectra(a), Ni 2p (b), Mo 3d (c) and S 2p (d)

before and after 7 times HMF oxidation.

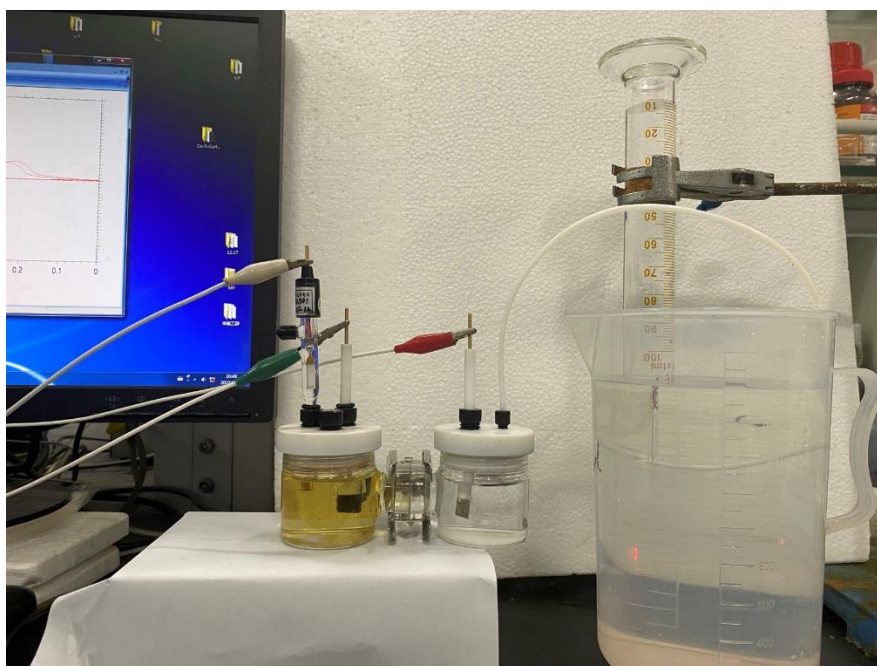

**Fig. S25** Diagram of hydrogen collection device in the cathode.

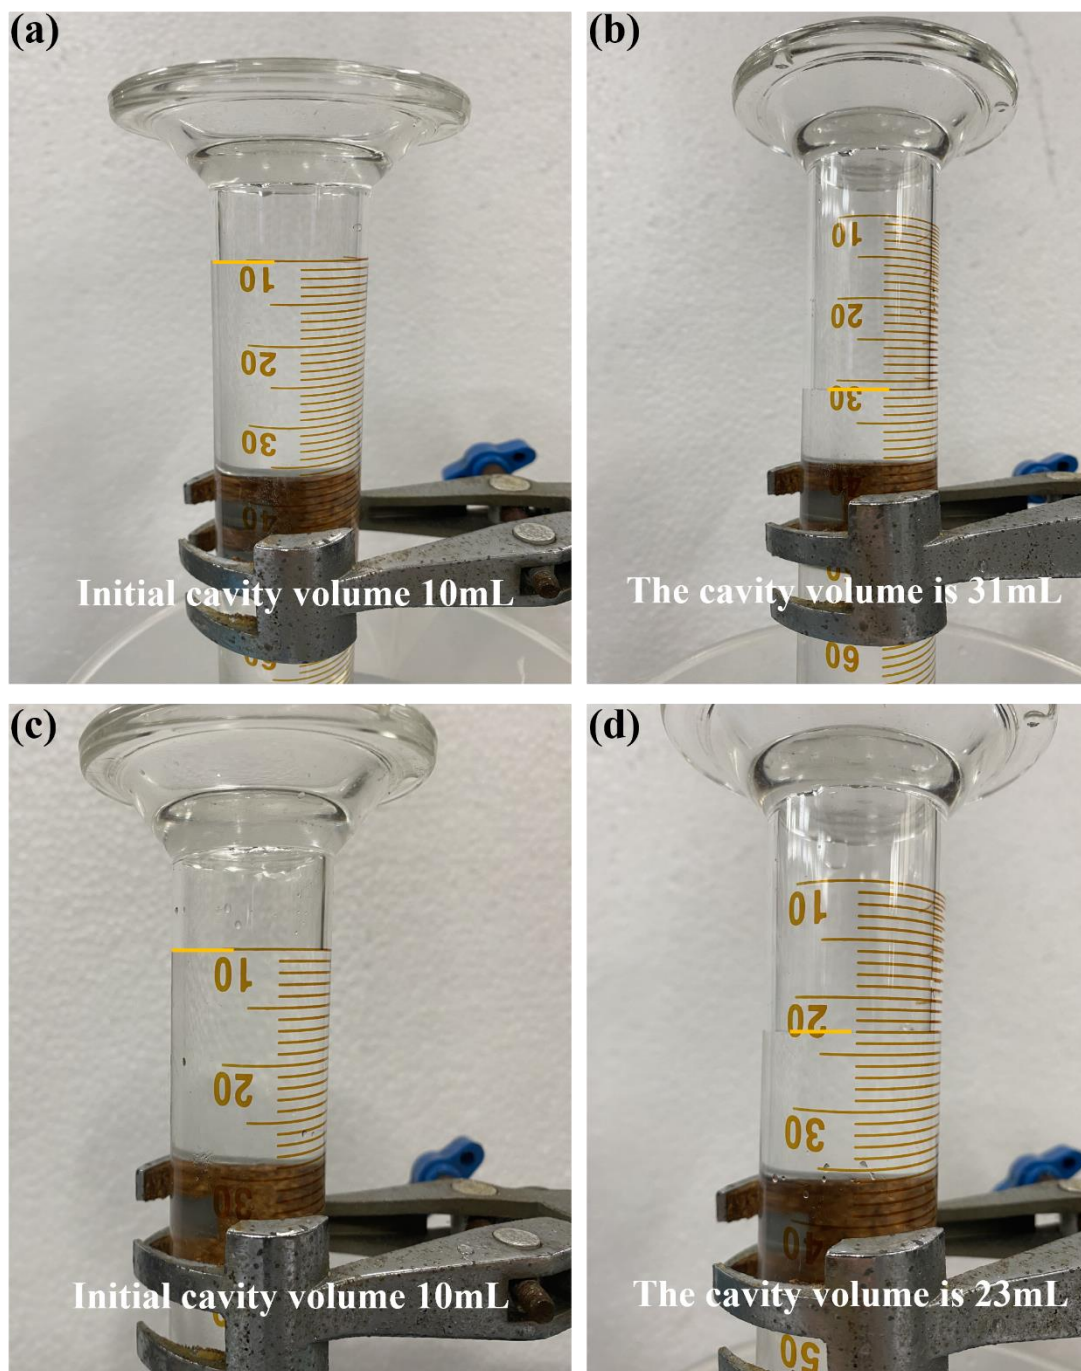

**Fig. S26** Hydrogen is collected by drainage (a-b) at 1.52 V (vs. RHE), Ni-Mo-S collects hydrogen at the cathode in the OER process for one hour. (c-d) at 1.52 V (vs. RHE), Ni-Mo-S collects hydrogen at the cathode in the HMFOR process for 10 minures with 1.0 M NaOH+20mM HMF.

**Table S1.** ICP-OES test of Ni-Mo-S catalyst.

| element | Sample element content<br>(mg/kg) | Sample element content<br>(%) |
|---------|-----------------------------------|-------------------------------|
| Mo      | 149091.12                         | 14.91%                        |
| Ni      | 548334.84                         | 54.83%                        |
| S       | 302574.04                         | 30.257%                       |

**Table S2.** FWHM, area ratio and atomic ratio of each element in Ni-Mo-S, Ni-Mo-O, MoS<sub>2</sub>/CC and Ni<sub>3</sub>S<sub>2</sub>/NF.

|                      | FWHM/eV | Area/CPS.eV | Atomic/% |
|----------------------|---------|-------------|----------|
| Ni-Mo-S              |         |             |          |
| Ni 2p                | 2.14    | 122099.5    | 63.56    |
| Mo 3d                | 0.99    | 1295.23     | 6.20     |
| S 2p                 | 2.24    | 2016.96     | 16.70    |
| C 1s                 | 2.48    | 981.93      | 5.14     |
| O 1s                 | 2.09    | 74877.3     | 8.40     |
| Ni-Mo-O              |         |             |          |
| Ni 2p                | 2.48    | 79502.76    | 23.16    |
| Mo 3d                | 1.5     | 33776.35    | 14.93    |
| O 1s                 | 1.47    | 45453.2     | 51.37    |
| C 1s                 | 1.6     | 5340.98     | 10.54    |
| MoS <sub>2</sub> /CC |         |             |          |
| Mo 3d                | 1.11    | 72474.12    | 13.15    |
| S 2p                 | 1.09    | 8765.08     | 11.3     |
| C 1s                 | 1.51    | 35642.6     | 36.12    |
| O 1s                 | 2.84    | 819807.48   | 40.80    |

|                                    |      |           |       |
|------------------------------------|------|-----------|-------|
| Ni <sub>3</sub> S <sub>2</sub> /NF |      |           |       |
| Ni 2p                              | 2.47 | 123926.93 | 31.89 |
| S 2p                               | 2.02 | 10018.73  | 18.88 |
| C 1s                               | 3.06 | 165761.89 | 22.81 |
| O 1s                               | 3.03 | 467222.61 | 26.42 |

**Table S3.** Impedance fitting results of as-prepared Ni-Mo-S, Ni-Mo-O, Ni<sub>3</sub>S<sub>2</sub>/NF, MoS<sub>2</sub>/CC and IrO<sub>2</sub>/CC.

|                                    | $R_s/\Omega \text{ cm}^{-2}$ | $R_{ct}/\Omega \text{ cm}^{-2}$ |
|------------------------------------|------------------------------|---------------------------------|
| Ni-Mo-S                            | 0.99                         | 1.06                            |
| Ni-Mo-O                            | 1.27                         | 1.11                            |
| Ni <sub>3</sub> S <sub>2</sub> /NF | 2.17                         | 1.56                            |
| MoS <sub>2</sub> /CC               | 2.85                         | 6.73                            |
| Ni foam                            | 2.59                         | 10.87                           |
| IrO <sub>2</sub> /CC               | 2.71                         | 8.87                            |

**Table S4.** Comparison of Ni-Mo-S with other electrocatalysts for HMFOR.

| Catalysts                          | HMF (mM) | Conversion (%) | FDCA yield (%) | FE (%) | Potential (V vs. RHE) | Ref. |
|------------------------------------|----------|----------------|----------------|--------|-----------------------|------|
| Pd <sub>1</sub> Au <sub>2</sub> /C | 20       | 100            | 83             | NA     | 0.90                  | [1]  |

|                                                      |     |      |      |      |                     |              |
|------------------------------------------------------|-----|------|------|------|---------------------|--------------|
| (AuPd) <sub>7</sub>                                  | 5   | 49.3 | 11.1 | 72.8 | 0.82                | [2]          |
| AuNi                                                 | 10  | 100  | 90   | 99   | 0.40(vs<br>Ag/AgCl) | [3]          |
| Ir-Co <sub>3</sub> O <sub>4</sub>                    | 10  | 100  | 98   | 98   | 1.42                | [4]          |
| Co <sub>3</sub> O <sub>4</sub>                       | 10  | 100  | 94.9 | 94.6 | 1.40                | [5]          |
| Ni <sub>2</sub> P NPA/NF                             | 10  | 100  | 98   | 98   | 1.423               | [6]          |
| CoO-CoSe <sub>2</sub>                                | 10  | 100  | 99   | 97.9 | 1.43                | [7]          |
| NiSe@NiO <sub>x</sub>                                | 10  | 98   | 97   | 96   | 1.423               | [8]          |
| NiOOH/FTO                                            | 5   | 99.8 | 96   | 96   | 1.47                | [9]          |
| Ni <sub>3</sub> S <sub>2</sub> /NF                   | 10  | 100  | 98   | 98   | 1.423               | [10]         |
| NiCo <sub>2</sub> O <sub>4</sub>                     | 5   | 99.6 | 90.4 | 87.5 | 1.50                | [11]         |
| Ni/NiOOH                                             | 650 | 100  | 89   | 80   | 1.55                | [12]         |
| CoB/NF                                               | 10  | 100  | 94   | 98   | 1.45                | [13]         |
| CuNi(OH) <sub>2</sub> /C                             | 5   | 98.8 | 93.3 | 94.4 | 1.45                | [14]         |
| MoO <sub>2</sub> -FeP@C                              | 10  | 99.4 | 98.6 | 97.8 | 1.424               | [15]         |
| Cu <sub>x</sub> S@NiCo-LDH                           | 10  | 100  | 99   | 99   | 1.32                | [16]         |
| N-NiMoO <sub>4</sub>                                 | 10  | 100  | 97   | 97   | 1.473               | [17]         |
| Ni <sub>3</sub> S <sub>2</sub> -MoS <sub>2</sub> /NF | 20  | 100  | 99   | 99   | 1.45                | [18]         |
| Ni-Mo-S                                              | 20  | 100  | 99.8 | 99.5 | 1.52                | This<br>work |

---

## References

- [1] D. J. Chadderdon, L. Xin, J. Qi, Y. Qiu, P. Krishna, K.L. More, W. Li, *Green Chem.* 2014, **16**, 3778-3786.
- [2] M. Park, M. Gu, B. S. Kim, *ACS Nano*, 2020, **14**, 6812-6822.
- [3] N. Heidary, N. Kornienko, *Chem. Sci.* 2020, **11**, 1798-1806.
- [4] Y. Lu, T. Liu, C.L. Dong, Y.C. Huang, Y. Li, J. Chen, Y. Zou, S. Wang, *Adv. Mater.* 2021, **33**, e2007056.
- [5] C. Chen, Z. Zhou, J. Liu, B. Zhu, H. Hu, Y. Yang, G. Chen, M. Gao, J. Zhang, *Appl. Catal. B Environ.* 2022, **307**, 121209.
- [6] B. You, N. Jiang, X. Liu, Y. Sun, *Angew. Chem. Int. Ed. Engl.* 2016, **55**, 9913-9917.
- [7] X. Huang, J. Song, M. Hua, Z. Xie, S. Liu, T. Wu, G. Yang, B. Han, *Green Chem.* 2020, **22**, 843-849.
- [8] L. Gao, Z. Liu, J. Ma, L. Zhong, Z. Song, J. Xu, S. Gan, D. Han, L. Niu, *Appl. Catal. B Environ.* 2020, **261**, 118235.
- [9] B. J. Taitt, D.-H. Nam, K.-S. Choi, *ACS Catal.* 2018, **9**, 660-670.
- [10] B. You, X. Liu, N. Jiang, Y. Sun, *J. Am. Chem. Soc.* 2016, **138**, 13639-13646.
- [11] M. J. Kang, H. Park, J. Jegal, S.Y. Hwang, Y.S. Kang, H.G. Cha, *Appl. Catal. B Environ.* 2019, **242**, 85-91.
- [12] R. Latsuzbaia, R. Bisselink, A. Anastasopol, H. van der Meer, R. van Heck, M.S. Yagüe, M. Zijlstra, M. Roelands, M. Crockatt, E. Goetheer, E. Giling, *J. Appl. Electrochem.* 2018, **48**, 611-626.
- [13] J. Weidner, S. Barwe, K. Sliozberg, S. Piontek, J. Masa, U.P. Apfel, W. Schuhmann, *Beilstein. J. Org. Chem.* 2018, **14**, 1436-1445.
- [14] H. Chen, J. T. Wang, Y. Yao, Z. H. Zhang, Z. Z. Yang, J. Li, K.Q. Chen, X. Y. Lu, P.K. Ouyang, J. Fu, *Chemelectrochem*, 2019, **6**, 5797-5801.
- [15] G. C. Yang, Y. Q. Jiao, H. J. Yan, Y. Xie, A. P. Wu, X. Dong, D. Z. Guo, C. G. Tian, H. G. Fu, *Adv. Mater.* 2020, **32**, 2000455.
- [16] X. Deng, X. Kang, M. Li, K. Xiang, C. Wang, Z. Guo, J. Zhang, X.-Z. Fu, J.-L. Luo, *J. Mater. Chem. A*, 2020, **8**, 1138-1146.
- [17] W. Wang, M. Wang, *Catal. Sci. Technol.* 2021, **11**, 7326-7330.

[18] S. Yang, Y. Guo, Y. Zhao, L. Zhang, H. Shen, J. Wang, J. Li, C. Wu, W. Wang, Y. Cao, S. Zhuo, Q. Zhang, H. Zhang, *Small*, 2022, **18**, e2201306.
